# Supplementary material
Source: PubMed Central journal article supplement (PMC4403656)
Supplement: JB.00008-15_zjb999093585so1.pdf [file JB.00008-15_zjb999093585so1.pdf]

1 **The *Bacillus subtilis* tyrZ gene encodes a highly selective tyrosyl-tRNA**  
2 **synthetase and is regulated by a MarR regulator and T box riboswitch**

3 Rebecca N. Williams-Wagner<sup>a</sup>, Frank J. Grundy<sup>a</sup>, Medha Raina<sup>a, b</sup>, Michael Ibba<sup>a, b</sup>, and  
4 Tina M. Henkin<sup>a, b</sup>

5 **Supplemental Materials**

6 **RNA purification and RT-PCR**

7 *B. subtilis* cells were grown to mid-log phase ( $A_{595}$  0.6-0.8). Cells were harvested  
8 and RNA was extracted by the hot acid phenol method (Collart & Oliviero, 2001). To  
9 reduce DNA contamination, the RNA was treated with RNase-free DNase I (Turbo  
10 DNA-free kit; Ambion) per the manufacturer's instructions. Thermoscript reverse  
11 transcriptase PCR (RT-PCR) system (Invitrogen) was used to carry out reverse  
12 transcription (4  $\mu$ g total RNA from BR151 derivatives; 6  $\mu$ g total RNA from 3610  
13 derivatives) using primer tyrZRT (0.5  $\mu$ M) at 53°C per the manufacturer's instructions.  
14 PCR was performed using Taq polymerase (Invitrogen) and the oligonucleotide primers  
15 tyrZRT (RC) and tyrZupstream (Table S2) under the following conditions: 95°C for 3 m,  
16 followed by 40 cycles of 94°C for 30 s, 60°C for 30 s, and 72°C for 60 s. An 850 bp  
17 band product is expected from this PCR reaction to indicate expression of *tyrZ*.  
18 Reactions to control for DNA contamination were performed in which reverse  
19 transcriptase was omitted, and no bands were observed after PCR analysis.

20

21

22

## References

23

1. **Collart M, Oliviero S.** 2001. Preparation of yeast RNA. *Curr. Prot. Mol. Biol.*

24

**13.12:** 1-5.

25

**Table S1. Bacterial strains**

| <b>Bacterium</b>   | <b>Strain</b>                | <b>Genotype</b>                                                                                                                     | <b>Source/Reference</b>                                                                                                          |
|--------------------|------------------------------|-------------------------------------------------------------------------------------------------------------------------------------|----------------------------------------------------------------------------------------------------------------------------------|
| <i>B. subtilis</i> | BR151                        | <i>lys-3 metB10 trpC2 dtd</i>                                                                                                       | Laboratory Stock                                                                                                                 |
|                    | ZB307A                       | <i>SPβc2del2::Tn917::sPK10Δ6 dtd</i>                                                                                                | P. Zuber                                                                                                                         |
|                    | ZB449                        | <i>trpC2 pheA1 abrB703 SPβ cured dtd</i>                                                                                            | P. Zuber                                                                                                                         |
|                    | BR151-ZKO                    | <i>lys-3 metB10 trpC2 tyrZ::neo dtd</i>                                                                                             | Grundy <i>et al.</i> , 1998                                                                                                      |
|                    | BR151-SKO-EQ4                | <i>lys-3 metB10 trpC2 tyrS::neo ywaEQ4 dtd</i>                                                                                      | This study                                                                                                                       |
|                    | BR151-SKO-E <sup>opA7G</sup> | <i>lys-3 metB10 trpC2 tyrS::neo ywaE<sup>opA7G</sup> dtd</i>                                                                        | This study                                                                                                                       |
|                    | BR151-EQ4                    | <i>lys-3 metB10 trpC2 acsA::cat ywaEQ4 dtd</i>                                                                                      | This study                                                                                                                       |
|                    | BR151-E <sup>opA7G</sup>     | <i>lys-3 metB10 trpC2 acsA::cat ywaE<sup>opA7G</sup> dtd</i>                                                                        | This study                                                                                                                       |
|                    | NCIB3610                     | <i>dtd</i>                                                                                                                          | BGSC <sup>a</sup>                                                                                                                |
|                    | 3610-ZKO                     | <i>tyrZ::neo dtd</i>                                                                                                                | This study                                                                                                                       |
|                    | 3610-SKO-E <sup>V164E</sup>  | <i>tyrS::neo ywaE<sup>V164E</sup> dtd</i>                                                                                           | This study                                                                                                                       |
|                    | 3610 Δ <i>epsH</i>           | <i>epsH::tet dtd</i>                                                                                                                | R. Losick                                                                                                                        |
|                    | 3610 Δ <i>tapA-sipW-tasA</i> | <i>(tapA-sipW-tasA)::spc dtd</i>                                                                                                    | R. Losick                                                                                                                        |
|                    | <i>E. coli</i>               | DH5α                                                                                                                                | <i>Φ80dlacZΔM15 endA1 recA1 hsdR17(r<sub>K</sub><sup>-</sup>m<sub>K</sub><sup>+</sup>) thi-1 gyrA96 relA1 Δ(lacZYA-argF)U169</i> |
| BL21(dE3)          |                              | <i>lon ompT</i>                                                                                                                     | Novagen                                                                                                                          |
| XL2-Blue           |                              | <i>endA1 supE44 thi-1 hsdR17 recA1 gyrA96 relA1 lac [F' proAB lacI<sup>f</sup>ZΔM15 Tn10 (Tet<sup>r</sup>) Amy Cam<sup>r</sup>]</i> | Agilent Technologies                                                                                                             |

<sup>a</sup> BGSC, Bacillus Genetic Stock Center, The Ohio State University, Columbus, OH 43210

**Table S2. Oligonucleotide primers**

| Primer                         | Sequence <sup>a, c</sup>                | Use                                                                                                                                                                                                                                                                                                                       |
|--------------------------------|-----------------------------------------|---------------------------------------------------------------------------------------------------------------------------------------------------------------------------------------------------------------------------------------------------------------------------------------------------------------------------|
| <b>ywaEBamUS</b>               | GAAGTGC <u>GGATCC</u> ACCACCTGTCCGTGGCG | Forward PCR primer for construction of <i>ywaE-tyrZ-lacZ</i> , <i>ywaE<sup>opA7G</sup>-tyrZ-lacZ</i> , <i>ywaE-lacZ</i> , <i>ywaE<sup>opA7G</sup>-lacZ</i> , <i>ywaE-tyrZΔterm-lacZ</i> , and <i>ywaE<sup>opA7G</sup>-tyrZΔterm-lacZ</i> fusions. Introduces a BamHI site 384 bp upstream of the <i>ywaE</i> start codon. |
| <b>tyrZDS (RC)<sup>b</sup></b> | ATGACTTCTAGAGCGCCTGTCATGTATAGC          | Reverse PCR primer for construction of <i>ywaE-tyrZ-lacZ</i> and <i>ywaE<sup>opA7G</sup>-tyrZ-lacZ</i> fusions. Introduces an XbaI site 78 bp downstream of the <i>tyrZ</i> start codon.                                                                                                                                  |
| <b>ywaEXbaDS (RC)</b>          | GTTTGAGTCTAGAAAGTGTATCGTGTCTTC          | Reverse PCR primer for construction of <i>ywaE-lacZ</i> and <i>ywaE<sup>opA7G</sup>-lacZ</i> fusions. Introduces an XbaI site 55 bp downstream of the <i>ywaE</i> start codon.                                                                                                                                            |
| <b>tyrZΔtermXb (RC)</b>        | CCATCTAGATAAGGGACGTGGCTCAATGCAC         | Reverse PCR primer for construction of <i>ywaE-tyrZΔterm-lacZ</i> and <i>ywaE<sup>opA7G</sup>-tyrZΔterm-lacZ</i> fusions. Introduces an XbaI site 42 bp upstream of the <i>tyrZ</i> start codon, removes the 3' half of the <i>tyrZ</i> T box transcriptional terminator.                                                 |
| <b>tyrZNcoUS</b>               | ATATTACCATGGATGAGAACATTTGAGCAGCTC       | Forward PCR primer to amplify the <i>tyrZ</i> coding region. Introduces an NcoI site immediately upstream of the <i>tyrZ</i> start codon.                                                                                                                                                                                 |
| <b>tyrZXhoDS (RC)</b>          | TAATTACTCGAGTTGGAGCTTTAAAACTTGCG        | Reverse PCR primer to amplify the <i>tyrZ</i> coding region. Introduces an XhoI site immediately before the <i>tyrZ</i> stop codon.                                                                                                                                                                                       |
| <b>tyrSNcoUS</b>               | ATATTACCATGGATGACTAACTTACTTGAAGACTTA    | Forward PCR primer to amplify the <i>tyrS</i> coding region. Introduces an NcoI site immediately upstream of the <i>tyrS</i> start codon.                                                                                                                                                                                 |
| <b>tyrSXhoDS (RC)</b>          | TAAAATCTCGAGTTTATACGTCACAAGGAAGTA       | Reverse PCR primer to amplify the <i>tyrS</i> coding region. Introduces an XhoI site immediately upstream of the <i>tyrS</i> stop codon.                                                                                                                                                                                  |
| <b>dtdBamUS</b>                | TAAGAGGATCCCAGGCAGTGAATGAAACG           | Forward PCR primer used to generate the upstream <i>dtd</i> fragment and the final <i>dtd</i> gene product. Introduces a BamHI site 196 bp upstream of the <i>dtd</i> start codon.                                                                                                                                        |

|                         |                                                     |                                                                                                                                                                              |
|-------------------------|-----------------------------------------------------|------------------------------------------------------------------------------------------------------------------------------------------------------------------------------|
| <b>dtdAUG (RC)</b>      | CTGAACAACACTAATCT <u>CAT</u> TTCTAACCCCTTTAG        | Reverse PCR primer used to generate the upstream <i>dtd</i> fragment. Introduces the AUG start codon in place of the AAG lysine codon.                                       |
| <b>dtdAUG</b>           | CTAAAGGGGTTAGAAA <u>TG</u> AGATTAGTTGTTTCAG         | Forward PCR primer used to generate the downstream <i>dtd</i> fragment. Introduces the AUG start codon in place of the AAG lysine codon.                                     |
| <b>dtdXbDS (RC)</b>     | TTCATAT <u>CTAG</u> AAAAAGTAACAGATGGGATCG           | Reverse PCR primer used to generate the downstream <i>dtd</i> fragment and final <i>dtd</i> gene product. Introduces an XbaI site 81 bp downstream of <i>dtd</i> stop codon. |
| <b>ywaEL101E</b>        | AGCAACGTGATCAAAA <u>CGGA</u> GAAAAAAGAGTTTTTGCCGT   | Forward PCR reaction primer used for oligomutagenesis to generate the <i>ywaEL101E-tyrZ-lacZ</i> fusion.                                                                     |
| <b>ywaEL101Erc (RC)</b> | ACGGCAAAAACCTTTTTTTT <u>CTTC</u> CGTTTTGATCACGTTGCT | Reverse PCR reaction primer used for oligomutagenesis to generate the <i>ywaEL101E-tyrZ-lacZ</i> fusion.                                                                     |
| <b>tyrZRT</b>           | GCTGATCCGTTCCGCC                                    | Reverse primer used for cDNA synthesis of the <i>tyrZ</i> gene by reverse transcriptase.                                                                                     |
| <b>tyrZRT (RC)</b>      | CAAAGTCGTCGCGCTCCATCAGGC                            | Reverse PCR primer used to amplify the <i>tyrZ</i> cDNA.                                                                                                                     |
| <b>tyrZupstream</b>     | GGGGAAACAGAGCTCATTGCGGGAA                           | Forward PCR primer used to amplify the <i>tyrZ</i> cDNA.                                                                                                                     |

---

<sup>a</sup> Restriction enzymes sites are underlined

<sup>b</sup> RC indicates primers oriented in the reverse complement to the gene sequence

<sup>c</sup> Changes to the gene sequence are double underlined

30

31

**Table S3. Expression of *ywaE-tyrZ-lacZ* fusions**

| Fusion                                                       | Strain                 | <i>tyrS/tyrZ</i> | $\beta$ -galactosidase activity |                 | Induction (Fold) <sup>b</sup> |
|--------------------------------------------------------------|------------------------|------------------|---------------------------------|-----------------|-------------------------------|
|                                                              |                        |                  | - 4ALP                          | + 4ALP          |                               |
| <i>ywaE-tyrZ<math>\Delta</math>term-lacZ</i>                 | SKO-E <sup>opA7G</sup> | <i>tyrZ</i>      | 0.83 $\pm$ 0.04                 | 0.91 $\pm$ 0.02 | 1.1                           |
| <i>ywaE<sup>opA7G</sup>-tyrZ<math>\Delta</math>term-lacZ</i> | BR151                  | Both             | 24 $\pm$ 1.5                    | 21 $\pm$ 1.8    | 0.87                          |
|                                                              | SKO-E <sup>opA7G</sup> | <i>tyrZ</i>      | 31 $\pm$ 4.9                    | 32 $\pm$ 6.2    | 1.0                           |
|                                                              | EQ4                    | Both             | 57 $\pm$ 1.7                    | 44 $\pm$ 8.2    | 0.77                          |

33 <sup>a</sup> Cells harboring each fusion were grown in the presence or absence of 4-amino-L-  
 34 phenylalanine (4-ALP) until late exponential phase, and then assayed for  $\beta$ -  
 35 galactosidase activity (Miller units). The values reported are averages of three repeats  
 36  $\pm$  standard error.

37 <sup>b</sup> Induction by 4-ALP was determined by the ratio of  $\beta$ -galactosidase activity in the  
 38 presence of 4-ALP to activity in the absence of 4-ALP.

39

40

41

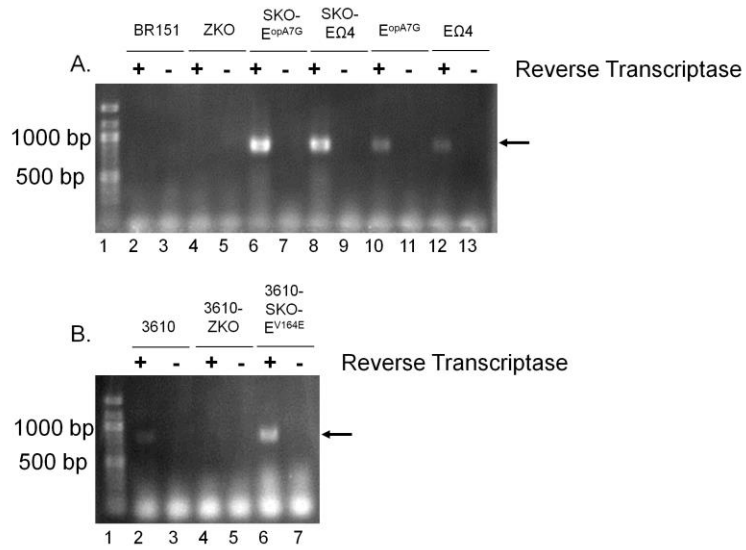

42

43 **Figure S1: RT-PCR analysis of *tyrZ* expression**

44 RT-PCR was conducted using 4  $\mu$ g of total RNA from A). BR151 derivatives, and 7  $\mu$ g total  
 45 RNA from B). 3610 derivatives. A band of 850 bp was expected to represent expression of  
 46 *tyrZ*, indicated by an arrow. The strains from which RNA was isolated are indicated above the  
 47 lanes.

48
